# Supplementary material
Source: publisher figshare collection journal article supplement (https://tandf.figshare.com/articles/dataset/_/10260005)
Supplement: Supplementary file 1 [file 1]

# Additional Empirical Results

| Error dist. | Sample size per group | Error dist. parameter | Error correlation | Correlation between covariates |              |                   |              |                   |              |
|-------------|-----------------------|-----------------------|-------------------|--------------------------------|--------------|-------------------|--------------|-------------------|--------------|
|             |                       |                       |                   | $\rho_c = 0.1$                 |              | $\rho_c = 0.5$    |              | $\rho_c = 0.9$    |              |
|             |                       |                       |                   | Prob of dominance              | Smooth means | Prob of dominance | Smooth means | Prob of dominance | Smooth means |
| Normal      | $n = 100$             | $\sigma = 0.1$        | $\rho_e = 0.1$    | 912                            | 900          | 906               | 907          | 844               | 847          |
|             |                       |                       | $\rho_e = 0.5$    | 929                            | 913          | 891               | 884          | 852               | 856          |
|             |                       |                       | $\rho_e = 0.9$    | 924                            | 915          | 905               | 892          | 853               | 851          |
|             |                       | $\sigma = 0.5$        | $\rho_e = 0.1$    | 852                            | 861          | 847               | 841          | 790               | 789          |
|             |                       |                       | $\rho_e = 0.5$    | 835                            | 829          | 810               | 806          | 789               | 786          |
|             |                       |                       | $\rho_e = 0.9$    | 840                            | 836          | 836               | 830          | 785               | 781          |
|             | $n = 200$             | $\sigma = 0.1$        | $\rho_e = 0.1$    | 954                            | 935          | 938               | 933          | 917               | 904          |
|             |                       |                       | $\rho_e = 0.5$    | 962                            | 943          | 956               | 945          | 923               | 913          |
|             |                       |                       | $\rho_e = 0.9$    | 966                            | 954          | 948               | 944          | 936               | 923          |
|             |                       | $\sigma = 0.5$        | $\rho_e = 0.1$    | 898                            | 895          | 900               | 893          | 851               | 846          |
|             |                       |                       | $\rho_e = 0.5$    | 876                            | 881          | 881               | 876          | 833               | 836          |
|             |                       |                       | $\rho_e = 0.9$    | 866                            | 861          | 880               | 880          | 867               | 864          |
|             |                       | $\sigma_{DE} = 0.1$   | $\rho_e = 0.1$    | 928                            | 917          | 891               | 888          | 840               | 836          |
|             |                       |                       | $\rho_e = 0.5$    | 917                            | 906          | 898               | 885          | 856               | 855          |
|             |                       |                       | $\rho_e = 0.9$    | 922                            | 910          | 892               | 892          | 843               | 851          |
|             |                       | $\sigma_{DE} = 0.5$   | $\rho_e = 0.1$    | 848                            | 848          | 826               | 834          | 820               | 824          |
|             |                       |                       | $\rho_e = 0.5$    | 847                            | 847          | 808               | 811          | 789               | 791          |
|             |                       |                       | $\rho_e = 0.9$    | 827                            | 827          | 820               | 819          | 792               | 793          |
| DE          | $n = 100$             | $\sigma_{DE} = 0.1$   | $\rho_e = 0.1$    | 955                            | 941          | 964               | 933          | 925               | 914          |
|             |                       |                       | $\rho_e = 0.5$    | 956                            | 940          | 948               | 932          | 933               | 928          |
|             |                       |                       | $\rho_e = 0.9$    | 959                            | 939          | 955               | 948          | 906               | 908          |
|             |                       | $\sigma_{DE} = 0.5$   | $\rho_e = 0.1$    | 898                            | 902          | 880               | 883          | 845               | 841          |
|             |                       |                       | $\rho_e = 0.5$    | 890                            | 886          | 859               | 859          | 840               | 839          |
|             |                       |                       | $\rho_e = 0.9$    | 877                            | 876          | 860               | 859          | 851               | 855          |
|             | $n = 200$             | $\sigma_{DE} = 0.1$   | $\rho_e = 0.1$    | 955                            | 941          | 964               | 933          | 925               | 914          |
|             |                       |                       | $\rho_e = 0.5$    | 956                            | 940          | 948               | 932          | 933               | 928          |
|             |                       | $\sigma_{DE} = 0.5$   | $\rho_e = 0.1$    | 898                            | 902          | 880               | 883          | 845               | 841          |
|             |                       |                       | $\rho_e = 0.5$    | 890                            | 886          | 859               | 859          | 840               | 839          |

Supplementary Table 1: Frequencies of correct treatment assignments in 1000 test cases by the proposed method with simulation Setting-1. Two treatments with two responses and  $w_j = 1; j = 1, 2$ .

| Error dist. | Sample size per group | Error dist. parameter | Error correlation | Correlation between covariates |              |                   |              |                   |              |
|-------------|-----------------------|-----------------------|-------------------|--------------------------------|--------------|-------------------|--------------|-------------------|--------------|
|             |                       |                       |                   | $\rho_c = 0.1$                 |              | $\rho_c = 0.5$    |              | $\rho_c = 0.9$    |              |
|             |                       |                       |                   | Prob of dominance              | Smooth means | Prob of dominance | Smooth means | Prob of dominance | Smooth means |
| Normal      | $n = 100$             | $\sigma = 0.1$        | $\rho_e = 0.1$    | 945                            | 860          | 951               | 886          | 918               | 870          |
|             |                       |                       | $\rho_e = 0.5$    | 956                            | 896          | 930               | 856          | 902               | 836          |
|             |                       |                       | $\rho_e = 0.9$    | 941                            | 888          | 934               | 884          | 925               | 872          |
|             |                       | $\sigma = 0.5$        | $\rho_e = 0.1$    | 797                            | 784          | 751               | 747          | 748               | 739          |
|             |                       |                       | $\rho_e = 0.5$    | 780                            | 775          | 761               | 751          | 747               | 735          |
|             |                       |                       | $\rho_e = 0.9$    | 752                            | 752          | 765               | 760          | 722               | 713          |
|             | $n = 200$             | $\sigma = 0.1$        | $\rho_e = 0.1$    | 964                            | 897          | 964               | 900          | 944               | 887          |
|             |                       |                       | $\rho_e = 0.5$    | 967                            | 904          | 966               | 898          | 968               | 890          |
|             |                       |                       | $\rho_e = 0.9$    | 956                            | 902          | 970               | 904          | 954               | 912          |
|             |                       | $\sigma = 0.5$        | $\rho_e = 0.1$    | 820                            | 816          | 803               | 794          | 771               | 765          |
|             |                       |                       | $\rho_e = 0.5$    | 821                            | 815          | 794               | 786          | 818               | 804          |
|             |                       |                       | $\rho_e = 0.9$    | 823                            | 803          | 794               | 776          | 783               | 787          |
| DE          | $n = 100$             | $\sigma_{DE} = 0.1$   | $\rho_e = 0.1$    | 946                            | 879          | 927               | 865          | 911               | 847          |
|             |                       |                       | $\rho_e = 0.5$    | 937                            | 876          | 941               | 879          | 927               | 876          |
|             |                       |                       | $\rho_e = 0.9$    | 943                            | 882          | 942               | 874          | 903               | 840          |
|             |                       | $\sigma_{DE} = 0.5$   | $\rho_e = 0.1$    | 790                            | 778          | 784               | 776          | 747               | 736          |
|             |                       |                       | $\rho_e = 0.5$    | 790                            | 779          | 750               | 745          | 736               | 722          |
|             |                       |                       | $\rho_e = 0.9$    | 780                            | 770          | 765               | 756          | 765               | 754          |
|             | $n = 200$             | $\sigma_{DE} = 0.1$   | $\rho_e = 0.1$    | 973                            | 887          | 967               | 897          | 957               | 891          |
|             |                       |                       | $\rho_e = 0.5$    | 963                            | 901          | 971               | 893          | 954               | 879          |
|             |                       |                       | $\rho_e = 0.9$    | 958                            | 889          | 955               | 888          | 950               | 891          |
|             |                       | $\sigma_{DE} = 0.5$   | $\rho_e = 0.1$    | 824                            | 817          | 799               | 789          | 815               | 803          |
|             |                       |                       | $\rho_e = 0.5$    | 836                            | 820          | 819               | 798          | 785               | 778          |
|             |                       |                       | $\rho_e = 0.9$    | 829                            | 806          | 791               | 783          | 822               | 812          |

Supplementary Table 2: Frequencies of correct treatment assignments in 1000 test cases by the proposed method with simulation Setting-1. Two treatments with three responses and  $w_j = 1; j = 1, \dots, 3$ .

| Error dist. | Sample size per group | Error dist. parameter | Error correlation | Correlation between covariates |              |                   |              |                   |              |
|-------------|-----------------------|-----------------------|-------------------|--------------------------------|--------------|-------------------|--------------|-------------------|--------------|
|             |                       |                       |                   | $\rho_c = 0.1$                 |              | $\rho_c = 0.5$    |              | $\rho_c = 0.9$    |              |
|             |                       |                       |                   | Prob of dominance              | Smooth means | Prob of dominance | Smooth means | Prob of dominance | Smooth means |
| Normal      | $n = 100$             | $\sigma = 0.1$        | $\rho_e = 0.1$    | 948                            | 859          | 928               | 817          | 906               | 829          |
|             |                       |                       | $\rho_e = 0.5$    | 950                            | 864          | 942               | 851          | 922               | 875          |
|             |                       |                       | $\rho_e = 0.9$    | 957                            | 891          | 930               | 846          | 918               | 842          |
|             |                       | $\sigma = 0.5$        | $\rho_e = 0.1$    | 809                            | 807          | 761               | 740          | 754               | 757          |
|             |                       |                       | $\rho_e = 0.5$    | 803                            | 785          | 751               | 747          | 733               | 727          |
|             |                       |                       | $\rho_e = 0.9$    | 759                            | 742          | 712               | 692          | 712               | 702          |
|             | $n = 200$             | $\sigma = 0.1$        | $\rho_e = 0.1$    | 968                            | 902          | 954               | 871          | 941               | 876          |
|             |                       |                       | $\rho_e = 0.5$    | 958                            | 894          | 958               | 883          | 945               | 880          |
|             |                       |                       | $\rho_e = 0.9$    | 958                            | 880          | 963               | 890          | 945               | 892          |
|             |                       | $\sigma = 0.5$        | $\rho_e = 0.1$    | 799                            | 786          | 779               | 777          | 777               | 771          |
|             |                       |                       | $\rho_e = 0.5$    | 804                            | 792          | 768               | 770          | 761               | 754          |
|             |                       |                       | $\rho_e = 0.9$    | 809                            | 809          | 772               | 765          | 750               | 734          |
| DE          | $n = 100$             | $\sigma_{DE} = 0.1$   | $\rho_e = 0.1$    | 945                            | 873          | 931               | 839          | 930               | 854          |
|             |                       |                       | $\rho_e = 0.5$    | 928                            | 877          | 949               | 847          | 904               | 846          |
|             |                       |                       | $\rho_e = 0.9$    | 949                            | 875          | 930               | 848          | 920               | 859          |
|             |                       | $\sigma_{DE} = 0.5$   | $\rho_e = 0.1$    | 786                            | 779          | 753               | 744          | 746               | 731          |
|             |                       |                       | $\rho_e = 0.5$    | 787                            | 789          | 749               | 735          | 748               | 738          |
|             |                       |                       | $\rho_e = 0.9$    | 763                            | 764          | 752               | 734          | 727               | 724          |
|             | $n = 200$             | $\sigma_{DE} = 0.1$   | $\rho_e = 0.1$    | 962                            | 886          | 954               | 865          | 945               | 865          |
|             |                       |                       | $\rho_e = 0.5$    | 954                            | 884          | 960               | 873          | 960               | 882          |
|             |                       |                       | $\rho_e = 0.9$    | 968                            | 878          | 947               | 875          | 945               | 872          |
|             |                       | $\sigma_{DE} = 0.5$   | $\rho_e = 0.1$    | 819                            | 797          | 792               | 793          | 784               | 784          |
|             |                       |                       | $\rho_e = 0.5$    | 817                            | 805          | 795               | 777          | 771               | 761          |
|             |                       |                       | $\rho_e = 0.9$    | 830                            | 810          | 764               | 752          | 785               | 776          |

Supplementary Table 3: Frequencies of correct treatment assignments in 1000 test cases by the proposed method with simulation Setting-1. Two treatments with four responses and  $w_j = 1; j = 1, \dots, 4$ .

| Error dist. | Sample size per group | Error dist. parameter | Error correlation | Correlation between covariates |              |                   |              |                   |              |
|-------------|-----------------------|-----------------------|-------------------|--------------------------------|--------------|-------------------|--------------|-------------------|--------------|
|             |                       |                       |                   | $\rho_c = 0.1$                 |              | $\rho_c = 0.5$    |              | $\rho_c = 0.9$    |              |
|             |                       |                       |                   | Prob of dominance              | Smooth means | Prob of dominance | Smooth means | Prob of dominance | Smooth means |
| Normal      | $n = 100$             | $\sigma = 0.1$        | $\rho_e = 0.1$    | 713                            | 642          | 660               | 599          | 634               | 583          |
|             |                       |                       | $\rho_e = 0.5$    | 670                            | 643          | 669               | 628          | 646               | 592          |
|             |                       |                       | $\rho_e = 0.9$    | 668                            | 633          | 644               | 583          | 636               | 595          |
|             |                       | $\sigma = 0.5$        | $\rho_e = 0.1$    | 519                            | 494          | 470               | 482          | 488               | 499          |
|             |                       |                       | $\rho_e = 0.5$    | 484                            | 481          | 481               | 487          | 437               | 449          |
|             |                       |                       | $\rho_e = 0.9$    | 478                            | 485          | 508               | 514          | 464               | 470          |
|             | $n = 200$             | $\sigma = 0.1$        | $\rho_e = 0.1$    | 755                            | 675          | 748               | 669          | 730               | 662          |
|             |                       |                       | $\rho_e = 0.5$    | 779                            | 697          | 746               | 686          | 714               | 658          |
|             |                       |                       | $\rho_e = 0.9$    | 784                            | 698          | 732               | 652          | 721               | 680          |
|             |                       | $\sigma = 0.5$        | $\rho_e = 0.1$    | 520                            | 536          | 481               | 485          | 506               | 522          |
|             |                       |                       | $\rho_e = 0.5$    | 501                            | 504          | 518               | 518          | 528               | 508          |
|             |                       |                       | $\rho_e = 0.9$    | 528                            | 525          | 494               | 499          | 499               | 510          |
| DE          | $n = 100$             | $\sigma_{DE} = 0.1$   | $\rho_e = 0.1$    | 686                            | 620          | 687               | 641          | 623               | 579          |
|             |                       |                       | $\rho_e = 0.5$    | 707                            | 643          | 659               | 624          | 635               | 612          |
|             |                       |                       | $\rho_e = 0.9$    | 683                            | 634          | 659               | 603          | 634               | 590          |
|             |                       | $\sigma_{DE} = 0.5$   | $\rho_e = 0.1$    | 508                            | 505          | 528               | 511          | 474               | 462          |
|             |                       |                       | $\rho_e = 0.5$    | 505                            | 510          | 469               | 474          | 452               | 441          |
|             |                       |                       | $\rho_e = 0.9$    | 503                            | 496          | 477               | 489          | 492               | 489          |
|             | $n = 200$             | $\sigma_{DE} = 0.1$   | $\rho_e = 0.1$    | 753                            | 691          | 760               | 680          | 718               | 659          |
|             |                       |                       | $\rho_e = 0.5$    | 729                            | 661          | 758               | 662          | 695               | 670          |
|             |                       |                       | $\rho_e = 0.9$    | 759                            | 695          | 754               | 671          | 713               | 669          |
|             |                       | $\sigma_{DE} = 0.5$   | $\rho_e = 0.1$    | 556                            | 551          | 507               | 506          | 533               | 525          |
|             |                       |                       | $\rho_e = 0.5$    | 531                            | 533          | 520               | 521          | 524               | 521          |
|             |                       |                       | $\rho_e = 0.9$    | 526                            | 536          | 532               | 517          | 508               | 506          |

Supplementary Table 4: Frequencies of correct treatment assignments in 1000 test cases by the proposed method with simulation Setting-1. Three treatments with two responses and  $w_j = 1; j = 1, 2$ .

| Error dist. | Sample size per group | Error dist. parameter | Error correlation | Correlation between covariates |              |                   |              |                   |              |
|-------------|-----------------------|-----------------------|-------------------|--------------------------------|--------------|-------------------|--------------|-------------------|--------------|
|             |                       |                       |                   | $\rho_c = 0.1$                 |              | $\rho_c = 0.5$    |              | $\rho_c = 0.9$    |              |
|             |                       |                       |                   | Prob of dominance              | Smooth means | Prob of dominance | Smooth means | Prob of dominance | Smooth means |
| Normal      | $n = 100$             | $\sigma = 0.1$        | $\rho_e = 0.1$    | 816                            | 736          | 795               | 729          | 760               | 700          |
|             |                       |                       | $\rho_e = 0.5$    | 818                            | 742          | 793               | 725          | 737               | 681          |
|             |                       |                       | $\rho_e = 0.9$    | 791                            | 729          | 782               | 708          | 744               | 712          |
|             |                       | $\sigma = 0.5$        | $\rho_e = 0.1$    | 505                            | 487          | 481               | 463          | 508               | 500          |
|             |                       |                       | $\rho_e = 0.5$    | 478                            | 480          | 474               | 466          | 482               | 481          |
|             |                       |                       | $\rho_e = 0.9$    | 489                            | 485          | 494               | 499          | 480               | 464          |
|             | $n = 200$             | $\sigma = 0.1$        | $\rho_e = 0.1$    | 890                            | 791          | 880               | 796          | 855               | 780          |
|             |                       |                       | $\rho_e = 0.5$    | 880                            | 774          | 864               | 776          | 831               | 759          |
|             |                       |                       | $\rho_e = 0.9$    | 902                            | 793          | 860               | 777          | 837               | 771          |
|             |                       | $\sigma = 0.5$        | $\rho_e = 0.1$    | 566                            | 576          | 545               | 551          | 555               | 553          |
|             |                       |                       | $\rho_e = 0.5$    | 523                            | 535          | 521               | 534          | 518               | 516          |
|             |                       |                       | $\rho_e = 0.9$    | 551                            | 561          | 548               | 543          | 499               | 508          |
| DE          | $n = 100$             | $\sigma_{DE} = 0.1$   | $\rho_e = 0.1$    | 824                            | 725          | 799               | 727          | 740               | 689          |
|             |                       |                       | $\rho_e = 0.5$    | 847                            | 729          | 767               | 704          | 755               | 690          |
|             |                       |                       | $\rho_e = 0.9$    | 820                            | 747          | 791               | 712          | 750               | 667          |
|             |                       | $\sigma_{DE} = 0.5$   | $\rho_e = 0.1$    | 534                            | 534          | 515               | 530          | 517               | 503          |
|             |                       |                       | $\rho_e = 0.5$    | 486                            | 494          | 485               | 472          | 483               | 470          |
|             |                       |                       | $\rho_e = 0.9$    | 490                            | 497          | 503               | 498          | 467               | 458          |
|             | $n = 200$             | $\sigma_{DE} = 0.1$   | $\rho_e = 0.1$    | 889                            | 793          | 879               | 784          | 852               | 781          |
|             |                       |                       | $\rho_e = 0.5$    | 920                            | 802          | 857               | 788          | 837               | 761          |
|             |                       |                       | $\rho_e = 0.9$    | 885                            | 787          | 880               | 778          | 846               | 780          |
|             |                       | $\sigma_{DE} = 0.5$   | $\rho_e = 0.1$    | 585                            | 571          | 560               | 550          | 576               | 575          |
|             |                       |                       | $\rho_e = 0.5$    | 561                            | 559          | 560               | 552          | 535               | 543          |
|             |                       |                       | $\rho_e = 0.9$    | 583                            | 574          | 544               | 543          | 547               | 556          |

Supplementary Table 5: Frequencies of correct treatment assignments in 1000 test cases by the proposed method with simulation Setting-1. Three treatments with three responses and  $w_j = 1; j = 1, \dots, 3$ .

| Error dist. | Sample size per group | Error dist. parameter | Error correlation | Correlation between covariates |              |                   |              |                   |              |
|-------------|-----------------------|-----------------------|-------------------|--------------------------------|--------------|-------------------|--------------|-------------------|--------------|
|             |                       |                       |                   | $\rho_c = 0.1$                 |              | $\rho_c = 0.5$    |              | $\rho_c = 0.9$    |              |
|             |                       |                       |                   | Prob of dominance              | Smooth means | Prob of dominance | Smooth means | Prob of dominance | Smooth means |
| Normal      | $n = 100$             | $\sigma = 0.1$        | $\rho_e = 0.1$    | 774                            | 716          | 725               | 670          | 702               | 657          |
|             |                       |                       | $\rho_e = 0.5$    | 761                            | 705          | 738               | 677          | 671               | 621          |
|             |                       |                       | $\rho_e = 0.9$    | 760                            | 709          | 728               | 672          | 673               | 646          |
|             |                       | $\sigma = 0.5$        | $\rho_e = 0.1$    | 513                            | 504          | 535               | 534          | 482               | 471          |
|             |                       |                       | $\rho_e = 0.5$    | 489                            | 498          | 479               | 473          | 487               | 484          |
|             |                       |                       | $\rho_e = 0.9$    | 508                            | 499          | 469               | 486          | 468               | 475          |
|             | $n = 200$             | $\sigma = 0.1$        | $\rho_e = 0.1$    | 849                            | 767          | 803               | 736          | 786               | 725          |
|             |                       |                       | $\rho_e = 0.5$    | 829                            | 739          | 834               | 755          | 775               | 732          |
|             |                       |                       | $\rho_e = 0.9$    | 859                            | 765          | 815               | 756          | 778               | 737          |
|             |                       | $\sigma = 0.5$        | $\rho_e = 0.1$    | 544                            | 552          | 539               | 535          | 538               | 547          |
|             |                       |                       | $\rho_e = 0.5$    | 550                            | 539          | 490               | 509          | 528               | 520          |
|             |                       |                       | $\rho_e = 0.9$    | 533                            | 540          | 556               | 544          | 515               | 522          |
| DE          | $n = 100$             | $\sigma_{DE} = 0.1$   | $\rho_e = 0.1$    | 769                            | 710          | 712               | 674          | 699               | 630          |
|             |                       |                       | $\rho_e = 0.5$    | 780                            | 689          | 736               | 672          | 689               | 614          |
|             |                       |                       | $\rho_e = 0.9$    | 767                            | 710          | 761               | 692          | 690               | 622          |
|             |                       | $\sigma_{DE} = 0.5$   | $\rho_e = 0.1$    | 484                            | 484          | 498               | 499          | 515               | 512          |
|             |                       |                       | $\rho_e = 0.5$    | 472                            | 481          | 507               | 521          | 461               | 449          |
|             |                       |                       | $\rho_e = 0.9$    | 509                            | 502          | 474               | 458          | 456               | 455          |
|             | $n = 200$             | $\sigma_{DE} = 0.1$   | $\rho_e = 0.1$    | 842                            | 756          | 836               | 759          | 815               | 751          |
|             |                       |                       | $\rho_e = 0.5$    | 882                            | 781          | 797               | 737          | 785               | 733          |
|             |                       |                       | $\rho_e = 0.9$    | 842                            | 765          | 819               | 726          | 808               | 759          |
|             |                       | $\sigma_{DE} = 0.5$   | $\rho_e = 0.1$    | 578                            | 579          | 576               | 576          | 557               | 552          |
|             |                       |                       | $\rho_e = 0.5$    | 558                            | 557          | 546               | 535          | 525               | 523          |
|             |                       |                       | $\rho_e = 0.9$    | 560                            | 556          | 535               | 543          | 521               | 522          |

Supplementary Table 6: Frequencies of correct treatment assignments in 1000 test cases by the proposed method with simulation Setting-1. Three treatments with three responses, using weights,  $\omega_1 = 0.5$ ,  $\omega_2 = 0.3$ , and  $\omega_3 = 0.2$ , for responses 1, 2, and 3, respectively.

| Error dist. | Sample size per group | Error dist. parameter | Error correlation | Correlation between covariates |              |                   |              |                   |              |
|-------------|-----------------------|-----------------------|-------------------|--------------------------------|--------------|-------------------|--------------|-------------------|--------------|
|             |                       |                       |                   | $\rho_c = 0.1$                 |              | $\rho_c = 0.5$    |              | $\rho_c = 0.9$    |              |
|             |                       |                       |                   | Prob of dominance              | Smooth means | Prob of dominance | Smooth means | Prob of dominance | Smooth means |
| Normal      | $n = 100$             | $\sigma = 0.1$        | $\rho_e = 0.1$    | 786                            | 695          | 749               | 655          | 733               | 675          |
|             |                       |                       | $\rho_e = 0.5$    | 792                            | 686          | 767               | 687          | 725               | 681          |
|             |                       |                       | $\rho_e = 0.9$    | 788                            | 677          | 769               | 679          | 714               | 632          |
|             |                       | $\sigma = 0.5$        | $\rho_e = 0.1$    | 514                            | 519          | 491               | 494          | 484               | 477          |
|             |                       |                       | $\rho_e = 0.5$    | 459                            | 452          | 512               | 493          | 468               | 469          |
|             |                       |                       | $\rho_e = 0.9$    | 485                            | 471          | 429               | 445          | 439               | 425          |
|             | $n = 200$             | $\sigma = 0.1$        | $\rho_e = 0.1$    | 822                            | 740          | 850               | 744          | 799               | 731          |
|             |                       |                       | $\rho_e = 0.5$    | 853                            | 758          | 820               | 722          | 824               | 753          |
|             |                       |                       | $\rho_e = 0.9$    | 882                            | 755          | 831               | 752          | 813               | 731          |
|             |                       | $\sigma = 0.5$        | $\rho_e = 0.1$    | 550                            | 549          | 514               | 525          | 519               | 531          |
|             |                       |                       | $\rho_e = 0.5$    | 521                            | 530          | 513               | 517          | 521               | 512          |
|             |                       |                       | $\rho_e = 0.9$    | 493                            | 497          | 505               | 498          | 506               | 495          |
| DE          | $n = 100$             | $\sigma_{DE} = 0.1$   |                   | $\rho_c = 0.1$                 |              | $\rho_c = 0.5$    |              | $\rho_c = 0.9$    |              |
|             |                       |                       | $\rho_e = 0.1$    | 783                            | 702          | 749               | 683          | 694               | 644          |
|             |                       |                       | $\rho_e = 0.5$    | 796                            | 686          | 751               | 699          | 706               | 645          |
|             |                       |                       | $\rho_e = 0.9$    | 787                            | 718          | 752               | 671          | 700               | 643          |
|             |                       | $\sigma_{DE} = 0.5$   | $\rho_e = 0.1$    | 507                            | 518          | 480               | 521          | 504               | 512          |
|             |                       |                       | $\rho_e = 0.5$    | 526                            | 503          | 524               | 494          | 474               | 470          |
|             |                       |                       | $\rho_e = 0.9$    | 522                            | 512          | 479               | 454          | 479               | 472          |
|             | $n = 200$             | $\sigma_{DE} = 0.1$   | $\rho_e = 0.1$    | 869                            | 749          | 838               | 726          | 784               | 734          |
|             |                       |                       | $\rho_e = 0.5$    | 865                            | 749          | 813               | 738          | 793               | 732          |
|             |                       |                       | $\rho_e = 0.9$    | 836                            | 738          | 826               | 725          | 789               | 724          |
|             |                       | $\sigma_{DE} = 0.5$   | $\rho_e = 0.1$    | 536                            | 560          | 528               | 534          | 534               | 558          |
|             |                       |                       | $\rho_e = 0.5$    | 541                            | 536          | 530               | 513          | 516               | 512          |
|             |                       |                       | $\rho_e = 0.9$    | 552                            | 520          | 554               | 545          | 543               | 511          |

Supplementary Table 7: Frequencies of correct treatment assignments in 1000 test cases by the proposed method with simulation Setting-1. Three treatments with four responses and  $w_j = 1; j = 1, \dots, 4$ .

| Error dist. | Sample size per group | Error dist. parameter | Error correlation | Correlation between covariates |              |                   |              |                   |              |
|-------------|-----------------------|-----------------------|-------------------|--------------------------------|--------------|-------------------|--------------|-------------------|--------------|
|             |                       |                       |                   | $\rho_c = 0.1$                 |              | $\rho_c = 0.5$    |              | $\rho_c = 0.9$    |              |
|             |                       |                       |                   | Prob of dominance              | Smooth means | Prob of dominance | Smooth means | Prob of dominance | Smooth means |
| Normal      | $n = 100$             | $\sigma = 0.1$        | $\rho_e = 0.1$    | 797                            | 735          | 771               | 731          | 703               | 649          |
|             |                       |                       | $\rho_e = 0.5$    | 825                            | 747          | 761               | 702          | 688               | 677          |
|             |                       |                       | $\rho_e = 0.9$    | 797                            | 710          | 755               | 692          | 678               | 640          |
|             |                       | $\sigma = 0.5$        | $\rho_e = 0.1$    | 516                            | 508          | 465               | 475          | 478               | 465          |
|             |                       |                       | $\rho_e = 0.5$    | 482                            | 472          | 475               | 478          | 422               | 410          |
|             |                       |                       | $\rho_e = 0.9$    | 504                            | 508          | 465               | 469          | 451               | 445          |
|             | $n = 200$             | $\sigma = 0.1$        | $\rho_e = 0.1$    | 880                            | 819          | 858               | 790          | 821               | 765          |
|             |                       |                       | $\rho_e = 0.5$    | 858                            | 788          | 840               | 749          | 800               | 748          |
|             |                       |                       | $\rho_e = 0.9$    | 864                            | 793          | 843               | 764          | 802               | 738          |
|             |                       | $\sigma = 0.5$        | $\rho_e = 0.1$    | 579                            | 588          | 550               | 549          | 514               | 515          |
|             |                       |                       | $\rho_e = 0.5$    | 519                            | 522          | 531               | 513          | 517               | 503          |
|             |                       |                       | $\rho_e = 0.9$    | 523                            | 527          | 514               | 510          | 491               | 490          |
| DE          | $n = 100$             | $\sigma_{DE} = 0.1$   | $\rho_e = 0.1$    | 809                            | 735          | 755               | 691          | 713               | 649          |
|             |                       |                       | $\rho_e = 0.5$    | 801                            | 729          | 742               | 706          | 703               | 663          |
|             |                       |                       | $\rho_e = 0.9$    | 807                            | 742          | 745               | 697          | 684               | 611          |
|             |                       | $\sigma_{DE} = 0.5$   | $\rho_e = 0.1$    | 503                            | 491          | 489               | 486          | 471               | 475          |
|             |                       |                       | $\rho_e = 0.5$    | 505                            | 522          | 491               | 493          | 449               | 447          |
|             |                       |                       | $\rho_e = 0.9$    | 524                            | 503          | 451               | 456          | 467               | 468          |
|             | $n = 200$             | $\sigma_{DE} = 0.1$   | $\rho_e = 0.1$    | 878                            | 783          | 835               | 755          | 819               | 753          |
|             |                       |                       | $\rho_e = 0.5$    | 858                            | 798          | 841               | 756          | 809               | 761          |
|             |                       |                       | $\rho_e = 0.9$    | 859                            | 781          | 855               | 760          | 814               | 768          |
|             |                       | $\sigma_{DE} = 0.5$   | $\rho_e = 0.1$    | 519                            | 517          | 537               | 532          | 547               | 542          |
|             |                       |                       | $\rho_e = 0.5$    | 543                            | 545          | 520               | 525          | 532               | 530          |
|             |                       |                       | $\rho_e = 0.9$    | 565                            | 553          | 556               | 545          | 510               | 515          |

Supplementary Table 8: Frequencies of correct treatment assignments in 1000 test cases by the proposed method with simulation Setting-1. Three treatments with four responses, using weights  $\omega_1 = 0.4$ ,  $\omega_2 = 0.3$ ,  $\omega_3 = 0.2$ , and  $\omega_4 = 0.1$ , for responses 1, 2, 3, and 4, respectively.



| Error dist. | Sample size per group | Error dist. parameter | Error correlation | Correlation between covariates |                |                |
|-------------|-----------------------|-----------------------|-------------------|--------------------------------|----------------|----------------|
|             |                       |                       |                   | $\rho_c = 0.1$                 | $\rho_c = 0.5$ | $\rho_c = 0.9$ |
| Normal      | $n = 100$             | $\sigma = 0.1$        | $\rho_e = 0.1$    | 669                            | 621            | 621            |
|             |                       |                       | $\rho_e = 0.5$    | 661                            | 642            | 578            |
|             |                       |                       | $\rho_e = 0.9$    | 655                            | 641            | 589            |
|             |                       | $\sigma = 0.5$        | $\rho_e = 0.1$    | 459                            | 491            | 431            |
|             |                       |                       | $\rho_e = 0.5$    | 441                            | 430            | 454            |
|             |                       |                       | $\rho_e = 0.9$    | 445                            | 425            | 430            |
|             | $n = 200$             | $\sigma = 0.1$        | $\rho_e = 0.1$    | 736                            | 688            | 693            |
|             |                       |                       | $\rho_e = 0.5$    | 709                            | 720            | 690            |
|             |                       |                       | $\rho_e = 0.9$    | 743                            | 721            | 688            |
|             |                       | $\sigma = 0.5$        | $\rho_e = 0.1$    | 508                            | 491            | 507            |
|             |                       |                       | $\rho_e = 0.5$    | 497                            | 463            | 484            |
|             |                       |                       | $\rho_e = 0.9$    | 505                            | 507            | 490            |
| DE          | $n = 100$             | $\sigma_{DE} = 0.1$   |                   | $\rho_c = 0.1$                 | $\rho_c = 0.5$ | $\rho_c = 0.9$ |
|             |                       |                       | $\rho_e = 0.1$    | 667                            | 619            | 588            |
|             |                       |                       | $\rho_e = 0.5$    | 656                            | 641            | 578            |
|             |                       |                       | $\rho_e = 0.9$    | 655                            | 641            | 587            |
|             |                       | $\sigma_{DE} = 0.5$   | $\rho_e = 0.1$    | 436                            | 442            | 470            |
|             |                       |                       | $\rho_e = 0.5$    | 425                            | 463            | 411            |
|             |                       |                       | $\rho_e = 0.9$    | 453                            | 415            | 414            |
|             | $n = 200$             | $\sigma_{DE} = 0.1$   | $\rho_e = 0.1$    | 726                            | 734            | 718            |
|             |                       |                       | $\rho_e = 0.5$    | 762                            | 687            | 703            |
|             |                       |                       | $\rho_e = 0.9$    | 737                            | 693            | 718            |
|             |                       | $\sigma_{DE} = 0.5$   | $\rho_e = 0.1$    | 540                            | 531            | 505            |
|             |                       |                       | $\rho_e = 0.5$    | 517                            | 501            | 483            |
|             |                       |                       | $\rho_e = 0.9$    | 506                            | 497            | 476            |

Supplementary Table 9: Frequencies of matched correct treatment assignments by both probability of dominance and smooth mean approaches in 1000 test cases, for three treatments with three responses, using weights,  $\omega_1 = 0.5$ ,  $\omega_2 = 0.3$ , and  $\omega_3 = 0.2$ , for responses 1, 2, and 3, respectively. The study was conducted with simulation Setting-1.

| Weights        |                | Common Assignments |       |       |       |
|----------------|----------------|--------------------|-------|-------|-------|
| $\omega_{CD4}$ | $\omega_{CD8}$ | Arm-0              | Arm-1 | Arm-2 | Arm-3 |
| 1              | 0              | 4                  | 602   | 252   | 151   |
| 0.8            | 0.2            | 4                  | 602   | 252   | 151   |
| 0.6            | 0.4            | 4                  | 636   | 164   | 112   |
| 0.5            | 0.5            | 77                 | 585   | 114   | 58    |

Supplementary Table 10: Common treatment assignment by probability of dominance and smooth means concepts for ACTG-175 clinical trial data, using weights  $\omega_{CD4}$  and  $\omega_{CD8}$  for CD4 and CD8 counts, respectively.

# **Carotid Artery Atherosclerosis in Type-2 Diabetes: The PROLOGUE Randomized Controlled Trial**

In this section, we provide another illustration of the proposed procedure using real data resulting from a randomized clinical trial conducted on type-2 diabetes patients.

It is well known that diabetes mellitus acts as a critical risk factor in the development of vascular complications (Rask-Madsen and King, 2013). Sitagliptin is an oral anti-diabetic drug that belongs to the family of dipeptidyl peptidase-4 inhibitors, which has been demonstrated to possess cardiovascular protective effects in recent studies (Sivertsen et al., 2012; Chrysant and Chrysant, 2012). PROLOGUE trial was a randomized controlled clinical trial conducted in type-2 diabetes mellitus patients to examine the effect of Sitagliptin added conventional therapy (i.e., diet, exercise, and/or drugs, except for incretin-related agents) on the intima-media thickness of the carotid artery (IMT) that is known to be a surrogate marker for the atherosclerotic cardiovascular disease (Oyama et al., 2016). We obtained the data set of this study from the Dryad Digital Repository.

In this study a total of 463 subjects aged 30 years and older with type-2 diabetes (i.e.,  $6.2\% \leq \text{HbA1c} < 9.4\%$ ) were randomized into either Sitagliptin or conventional therapy arms with 1:1 allocation. Among 463 patients, 232 were assigned to the Sitagliptin arm and 231 were assigned to conventional therapy. The primary endpoint of the trial was the percentage change in mean common carotid arteries (CCA) IMT from the baseline to

24 months after the randomization. Additionally, there were multiple outcome measures considered as secondary endpoints; few of them relating to cardiovascular risk, glycemic profiles, lipoprotein profiles and renal function. Outcome measures were obtained at baseline, at 12 months and at 24 months time points.

Among many available outcome measures, we choose CCA IMT, HbA1c, eGFR, and Creatinine level measured at 12 months after the randomization as responses for our illustration. There were a total of 296 subjects with list-wise complete observations for aforementioned responses at the 12 month time point (Sitagliptin-150, conventional therapy-146). Since our method is developed for complete data, we used the 12 month observation point instead of 24 months due to the large fraction of list-wise missingness detected in 24 month observation point. We used subjects' baseline details: age, CCA IMT, HbA1c, eGFR, Creatinine, and HDL cholesterol values as covariates. In our analysis, we considered negative CCA IMT, HbA1c, and Creatinine values at 12 months in the sense that higher values of these outcomes represent better treatment responses.

Similar to the previous demonstration using ACTG-175 trial data, our intention in this data analysis is to illustrate the estimated optimal treatment for a new patient by the proposed technique based on individualized characteristics. However, due to the limited number of data points, we followed a leave-one-out type approach as opposed to portioning the dataset into separate "Training" and "Testing" sets as in the ACTG-175 case. We estimated the optimal treatment for an individual in this data set using models obtained by eliminating the corresponding subject, one at a time.

| Weights            |                  |                 |                       | Probability<br>of Dominance |       | Smooth Means |       |
|--------------------|------------------|-----------------|-----------------------|-----------------------------|-------|--------------|-------|
| $\omega_{CCA-IMT}$ | $\omega_{HbA1c}$ | $\omega_{eGFR}$ | $\omega_{creatinine}$ | Arm-1                       | Arm-2 | Arm-1        | Arm-2 |
| 0.25               | 0.25             | 0.25            | 0.25                  | 222                         | 74    | 224          | 72    |
| 0.40               | 0.20             | 0.10            | 0.30                  | 177                         | 119   | 183          | 113   |
| 0.10               | 0.30             | 0.40            | 0.20                  | 181                         | 115   | 184          | 112   |
| 0.10               | 0.60             | 0.20            | 0.10                  | 49                          | 247   | 87           | 209   |

Supplementary Table 11: Treatment assignment summary for PROLOGUE Clinical Trial data, by the proposed method. Four outcomes: CCA IMT, HbA1c, eGFR, and creatinine selected as clinical responses, with weights  $\omega_{CCA-IMT}$ ,  $\omega_{HbA1c}$ ,  $\omega_{eGFR}$ , and  $\omega_{creatinine}$ , respectively.

In Supplementary Table 11 we provide proposed treatment assignments for all 296 patient with a few selected weight combinations for responses. For example, when we equally weighted all responses, we observed 222 and 74 patients were assigned to sitagliptin (Arm-1) and conventional therapy (Arm-2), respectively by the probability of dominance method. The corresponding assignments via smooth means were 224 and 74 for Arm-1 and Arm-2, respectively. Furthermore, parallel to the concept used in ACTG-175 application for calculating an overall gain in outcomes, an overall gain was calculated. As indicated in Supplementary Table 12, we clearly observed overall positive gains for each weight combination used.

| Weights            |                  |                 |                       | Probability of Dominance |                        |                       |                             |                | Smooth means             |                        |                       |                             |                |
|--------------------|------------------|-----------------|-----------------------|--------------------------|------------------------|-----------------------|-----------------------------|----------------|--------------------------|------------------------|-----------------------|-----------------------------|----------------|
| $\omega_{CCA-IMT}$ | $\omega_{HbA1c}$ | $\omega_{eGFR}$ | $\omega_{creatinine}$ | $\hat{\Delta}^{CCA-IMT}$ | $\hat{\Delta}^{HbA1c}$ | $\hat{\Delta}^{eGFR}$ | $\hat{\Delta}^{creatinine}$ | $\hat{\Delta}$ | $\hat{\Delta}^{CCA-IMT}$ | $\hat{\Delta}^{HbA1c}$ | $\hat{\Delta}^{eGFR}$ | $\hat{\Delta}^{creatinine}$ | $\hat{\Delta}$ |
| 0.25               | 0.25             | 0.25            | 0.25                  | 0.1317                   | 0.0581                 | 0.1428                | 0.0304                      | 0.0906         | 0.1131                   | 0.0476                 | 0.1310                | 0.0058                      | 0.0744         |
| 0.40               | 0.20             | 0.10            | 0.30                  | 0.1317                   | 0.0570                 | 0.1228                | 0.0162                      | 0.0812         | 0.1220                   | 0.0308                 | 0.1030                | -0.0087                     | 0.0627         |
| 0.10               | 0.30             | 0.40            | 0.20                  | 0.1134                   | 0.0319                 | 0.1566                | 0.0600                      | 0.0956         | 0.0854                   | 0.0260                 | 0.1354                | 0.0240                      | 0.0753         |
| 0.10               | 0.60             | 0.20            | 0.10                  | 0.0572                   | 0.0752                 | 0.1370                | 0.0624                      | 0.0845         | 0.0602                   | 0.0739                 | 0.1170                | 0.0433                      | 0.0781         |

Supplementary Table 12: Estimated  $\Delta$  values by the proposed method compared to the original assignment. Four outcomes: CCA IMT, HbA1c, eGFR, and creatinine selected as clinical responses, with weights  $\omega_{CCA-IMT}$ ,  $\omega_{HbA1c}$ ,  $\omega_{eGFR}$ , and  $\omega_{creatinine}$ , respectively.

## Supplementary References

1. Rask-Madsen, C., & King, G. L. (2013). Vascular complications of diabetes: mechanisms of injury and protective factors. *Cell metabolism*, 17(1): 20-33.
2. Sivertsen, J., Rosenmeier, J., Holst, J.J., & Vilsbøll, T. (2012). The effect of glucagon-like peptide 1 on cardiovascular risk. *Nat Rev Cardiol.*, 9: 209–222.
3. Chrysant, S.G. & Chrysant, G.S. (2012). Clinical implications of cardiovascular preventing pleiotropic effects of dipeptidyl peptidase-4 inhibitors. *Am J Cardiol.*, 109: 1681–1685.
4. Oyama, J., Murohara, T., Kitakaze, M., Ishizu, T., Sato, Y., et al. (2016). The Effect of Sitagliptin on Carotid Artery Atherosclerosis in Type 2 Diabetes: The PROLOGUE Randomized Controlled Trial. *PLoS medicine*, 13(6): e1002051. doi:10.1371/journal.
